# Supplementary material for: Does Work Disability Contribute to Trajectories of Work Participation before and after Vocational Labour Market Training for Job Seekers?
Source: MDPI journal article supplement (doi:10.3390/ijerph18031347), 2021-02-02
Supplement: s1 [file s1]

**Table S1.** Distribution (%) of background factors amongst the study population of vocational labour market trainees with and without previous work disability, presented separately for men and for women.

| Background factors              | Men                           |                                  |                                                    | Women                         |                                  |                                                    |
|---------------------------------|-------------------------------|----------------------------------|----------------------------------------------------|-------------------------------|----------------------------------|----------------------------------------------------|
|                                 | With Previous Work Disability | Without Previous Work Disability | <i>p</i> -Value for Difference in the Distribution | With Previous Work Disability | Without Previous Work Disability | <i>p</i> -Value for Difference in the Distribution |
| Age                             |                               |                                  | 0.000                                              |                               |                                  | 0.000                                              |
| 25–29                           | 15.8                          | 23.3                             |                                                    | 12.3                          | 19.9                             |                                                    |
| 30–34                           | 15.7                          | 18.2                             |                                                    | 14.4                          | 18.1                             |                                                    |
| 35–39                           | 15.5                          | 14.7                             |                                                    | 15.6                          | 16.0                             |                                                    |
| 40–44                           | 18.5                          | 15.7                             |                                                    | 19.8                          | 17.8                             |                                                    |
| 45–49                           | 18.5                          | 15.1                             |                                                    | 19.3                          | 15.8                             |                                                    |
| 50–54                           | 16.1                          | 13.0                             |                                                    | 18.6                          | 12.4                             |                                                    |
| Region of residence             |                               |                                  | 0.000                                              |                               |                                  | 0.001                                              |
| South                           | 44.2                          | 44.3                             |                                                    | 46.5                          | 45.2                             |                                                    |
| West                            | 26.4                          | 23.3                             |                                                    | 24.6                          | 23.6                             |                                                    |
| East                            | 16.0                          | 16.1                             |                                                    | 16.4                          | 16.6                             |                                                    |
| North                           | 13.5                          | 16.3                             |                                                    | 12.5                          | 14.6                             |                                                    |
| Education                       |                               |                                  | 0.000                                              |                               |                                  | 0.000                                              |
| Tertiary                        | 14.8                          | 24.8                             |                                                    | 26.0                          | 32.8                             |                                                    |
| Secondary                       | 62.3                          | 56.4                             |                                                    | 53.3                          | 49.3                             |                                                    |
| Primary                         | 22.9                          | 18.8                             |                                                    | 20.7                          | 17.8                             |                                                    |
| Years since completed education |                               |                                  | 0.000                                              |                               |                                  | 0.000                                              |
| 1–2                             | 3.5                           | 6.4                              |                                                    | 4.6                           | 7.7                              |                                                    |
| 3–5                             | 6.7                           | 9.5                              |                                                    | 9.2                           | 10.9                             |                                                    |
| 6–10                            | 16.1                          | 20.1                             |                                                    | 17.5                          | 20.6                             |                                                    |
| 11–20                           | 30.3                          | 30.4                             |                                                    | 29.6                          | 30.4                             |                                                    |
| >20                             | 43.3                          | 33.5                             |                                                    | 39.2                          | 30.3                             |                                                    |
| Occupational class              |                               |                                  | 0.000                                              |                               |                                  | 0.000                                              |
| Upper non-manual                | 7.9                           | 13.0                             |                                                    | 8.4                           | 11.1                             |                                                    |
| Lower non-manual                | 13.7                          | 17.1                             |                                                    | 38.9                          | 38.1                             |                                                    |
| Skilled manual                  | 59.1                          | 48.3                             |                                                    | 26.5                          | 24.9                             |                                                    |
| Unskilled manual                | 9.2                           | 7.6                              |                                                    | 16.4                          | 11.8                             |                                                    |
| Self-employed                   | 2.8                           | 3.1                              |                                                    | 3.4                           | 4.1                              |                                                    |
| No determined occupation        | 7.3                           | 10.9                             |                                                    | 6.4                           | 10.0                             |                                                    |
| Employment sector               |                               |                                  | 0.000                                              |                               |                                  | 0.000                                              |
| Private                         | 86.3                          | 84.0                             |                                                    | 70.1                          | 67.1                             |                                                    |
| Public                          | 7.6                           | 7.0                              |                                                    | 23.4                          | 19.8                             |                                                    |
| No determined employment sector | 6.1                           | 9.1                              |                                                    | 6.5                           | 13.1                             |                                                    |
| Industrial sector               |                               |                                  | 0.000                                              |                               |                                  | 0.000                                              |
| Manufacturing                   | 42.0                          | 36.5                             |                                                    | 19.4                          | 16.4                             |                                                    |
| Construction                    | 12.0                          | 11.4                             |                                                    | 1.5                           | 1.8                              |                                                    |
| Trade                           | 7.5                           | 7.7                              |                                                    | 11.1                          | 12.2                             |                                                    |
| Transportation and storage      | 8.0                           | 5.8                              |                                                    | 3.1                           | 2.6                              |                                                    |
| Knowledge work                  | 6.8                           | 10.8                             |                                                    | 9.4                           | 10.3                             |                                                    |
| Health and social work          | 2.4                           | 2.3                              |                                                    | 19.4                          | 14.1                             |                                                    |
| Other                           | 15.2                          | 16.5                             |                                                    | 29.5                          | 29.6                             |                                                    |
| No determined industrial sector | 6.1                           | 9.1                              |                                                    | 6.5                           | 13.1                             |                                                    |
| Start year of training          |                               |                                  | 0.000                                              |                               |                                  | 0.001                                              |
| 2008                            | 29.8                          | 26.5                             |                                                    | 36.2                          | 33.9                             |                                                    |
| 2009                            | 38.8                          | 38.7                             |                                                    | 35.2                          | 34.9                             |                                                    |
| 2010                            | 31.4                          | 34.8                             |                                                    | 28.6                          | 31.2                             |                                                    |
| Duration of training in months  |                               |                                  | 0.298                                              |                               |                                  | 0.023                                              |
| ≤0.4                            | 17.5                          | 17.1                             |                                                    | 10.2                          | 9.7                              |                                                    |

---

|        |       |        |       |        |
|--------|-------|--------|-------|--------|
| >0.4–2 | 18.7  | 18.8   | 16.9  | 16.8   |
| >2–6   | 24.9  | 25.2   | 25.6  | 26.4   |
| >6–12  | 26.0  | 26.9   | 32.1  | 33.4   |
| >12    | 12.9  | 12.1   | 15.2  | 13.6   |
| Total  | 100.0 | 100.0  | 100.0 | 100.0  |
| N      | 6 797 | 17 502 | 5 900 | 12 492 |

---
